# Supplementary material
Source: PubMed Central journal article supplement (PMC5643230)
Supplement: NIHMS892514-supplement.pdf [file NIHMS892514-supplement.pdf]

# **No Evidence That Schizophrenia Candidate Genes Are More Associated With Schizophrenia Than Non-Candidate Genes**

## ***Supplemental Information***

### **Supplemental Methods and Supplemental Figures**

Here we cover a few of the analysis steps in more detail, but refer the reader to CA de Leeuw *et al.* (2015) (1) for in-depth questions about statistical details, assumptions, and implementation of the MAGMA gene-set analysis program: [Link to primary publication](#).

Our analysis script is available upon request, and almost all of the datasets used in our analyses are publically available. The most current export from the SZGene (2) database is available in .csv format upon request from Dr. Matthew McQueen (Matt.McQueen@colorado.edu).

### **SNP annotation and calculation of the gene-wise $p$ -value**

First, SNPs were matched to genes using NCBI Build 37 gene locations. As in Farrell *et al.* (3), we specified that SNPs in a 25 kb window around each gene be assigned to that gene, in order to capture the effects of any variants that might lie outside strict gene boundaries but still act on the nearest gene (e.g. variants in nearby enhancer or promoter regions). We repeated the same analyses with strict gene boundaries as defined in NCBI Build 37.

Next, the joint association of SNPs with the phenotype was computed for each gene, using the PGC GWAS summary statistics as input and the 1000 Genomes (4) European samples as the reference sample to calculate the LD between SNPs. The gene-level  $p$ -values were calculated by summing the  $-\log(p)$  for all SNP  $p$ -values in the boundary of gene  $i$  (the distribution of this sum is unknown but is approximated by a scaled chi-square distribution, with degrees of freedom ( $df$ ) and scaling a function of the squared SNP-SNP correlation matrix, which simultaneously accounts for LD between SNPs). This  $\text{sum}(-\log(p))$  was the gene-level test statistic used in our primary analyses, but we also repeated these procedures using the minimum SNP  $p$ -value in a gene as the gene-level statistic and report those results in Table S2.

### **Variations on the gene set test: self-contained, competitive, and relative tests**

The “self-contained” analysis, which is equivalent to a single-sample t-test of association, restricts the model to only include the genes in the gene set and tests whether those genes are associated with schizophrenia by testing whether the mean  $z$ -score of the set (the intercept in the model) is different from zero: this is implemented as testing the null hypothesis  $H_0: \beta_0 = 0$  against the alternative hypothesis  $H_a: \beta_0 > 0$  in the regression model  $z_i = \beta_0 \vec{1} + \beta_{2_i} C_i + \varepsilon_i$ , where the gene-level  $z$ -score, representing the association of each gene  $i$  with schizophrenia ( $z_i = \Phi(1-p_i)$  with  $p_i$  being the  $p$ -value for gene  $i$ ), is the outcome variable, and the residual covariance, modeled using estimated gene-gene correlations to account for LD between genes, is represented here as the vector  $\varepsilon_i$ . Gene size, SNP density, and minor allele count (as well as the log of these gene characteristics), and any other covariates of interest (gene annotations, etc.) are

included as a matrix of covariates (represented here as the  $C$  term in the regression framework). The  $p$ -value for the self-contained test with the set of 25 candidate genes was highly significant ( $p = 1e-14$ ). However, this result is not of great relevance because, with a highly polygenic trait and enough statistical power, virtually any random set of genes could be significantly associated with a trait. We report this result here because it demonstrates that even gene sets which are not close to statistically significant when controlling for baseline association across the genome (as we demonstrate below and in the main text) can appear highly significant when that baseline level of association is not accounted for.

The competitive analysis is implemented as a one-tailed test of the  $b$  term in the model:  $z = \alpha + G_1\beta + C\vec{\gamma} + \varepsilon$ .  $z$  represents the gene-level  $z$ -score (the association of each gene with schizophrenia),  $G_1$  is a dummy-coded predictor indicating gene set membership, and  $C$  is a matrix of possible confounders including gene length, SNP density, minor allele count, and their log transforms. Because gene level statistics are correlated with those from neighboring genes, the residuals  $\varepsilon$  cannot be assumed to be independent. The covariances of the residuals are therefore modeled as the estimated gene-gene correlations ( $\hat{\Sigma}$ ) scaled by a residual variance term ( $\sigma_\varepsilon^2$ ), ie.  $\varepsilon \sim MVN(0, \sigma_\varepsilon^2 \hat{\Sigma})$ .

The “relative” test is implemented in the following (simplified) regression framework:  $z = \alpha + G_1\beta_1 + G_2\beta_2 + C\vec{\gamma} + \varepsilon$ , where  $G_1$  is a dummy-coded variable representing gene set membership (i.e.  $G_1 = 1$  if the gene is in gene set 1,  $G_1 = 0$  otherwise), and  $G_2$  is a dummy-coded variable representing membership in a comparison gene set. By default,

the relative analysis tests the null hypothesis  $H_0: \beta_1 = \beta_2$  against the alternative hypothesis  $H_a: \beta_1 > \beta_2$ , or in other words: is the association of genes in set 1 with the phenotype significantly stronger than the association of the genes in set 2? However, we specified a two-tailed test in MAGMA, such that the null hypothesis  $H_0: \beta_1 = \beta_2$  is tested against the alternative hypothesis  $H_a: \beta_1 \neq \beta_2$ , since, presumably, we are also interested in the possibility that the set of genes associated with height, for example, might be more strongly related to schizophrenia than the set of actual schizophrenia candidate genes. More information on these gene set analysis variations is given in the original MAGMA publication (1).

### **Tests for sensitivity and specificity**

In addition to the main analyses outlined in the manuscript, we ran three additional analyses to ensure that our method was both sensitive and specific. We first conducted a very basic, proof-of-concept check for sensitivity: we tested whether a gene set made up of the most significantly-associated gene from each autosome from the PGC GWAS was more associated with schizophrenia when tested as a gene set in MAGMA. As expected, this gene set was much more significantly associated with schizophrenia than all other genes ( $\beta = 2.44$ ,  $SE = 0.22$ ,  $p = 2.96 \times 10^{-28}$  in a competitive test), confirming that our analysis correctly rejected the null hypothesis when appropriate. MAGMA also appeared to be sensitive under the alternative when testing whether the set of 1028 genes associated with synaptic processes was more associated with schizophrenia than other genes ( $\beta = 0.152$ ,  $SE = 0.04$ ,  $p = 1.94 \times 10^{-5}$  for the competitive test). Finally, to test specificity under the null, we used genes implicated in height GWAS and confirmed

that these genes were not significantly associated with schizophrenia more than expected by chance ( $\beta = 0.05$ ,  $SE = 0.08$ ,  $p = 0.27$  for the competitive test).

### **Examining the effect of the size of gene set on power in competitive tests**

To test whether the competitive test on the 86 candidate genes was more significant than the competitive test on the 25 candidate genes was simply due to increased power due to different gene set sizes, we randomly sampled from 1 to 100 genes from the full set of 1028 genes involved in synaptic processes, which as a group are more associated with schizophrenia than other genes ( $\beta = 0.152$ ,  $SE = 0.04$ ,  $p = 1.94e^{-05}$  for the competitive test; set taken from Ruano *et al.* (5) and Lips *et al.* (6)) and then performed a basic competitive gene set test in MAGMA, with the randomly sampled genes grouped as the gene set of interest and all other non-synaptic genes in the genome as the comparison set (we excluded all genes related to synaptic processes from the genome-wide comparison set at the beginning of our simulations, in order to control for the possibility of confounding by varying numbers of comparison genes being included in the test.) We repeated this sampling process 5,000 times and recorded the gene set  $p$ -value returned from MAGMA for each of the iterations. We then calculated the average  $p$ -value across all samples for each size gene set (i.e., there were approximately 50 samples for each size gene set  $n$  from 1 to 100). These 100 average  $p$ -values, for each size gene set from 1 to 100, are plotted in Figure S2. The results demonstrated that as the size of a set of genes known to be associated with a trait increased, power of the MAGMA competitive test also increased: the correlation

between the gene set size and average  $p$ -value was negative ( $r = -0.90$ ) and highly significant ( $p < 2.2e-16$ ).

### **Does differential gene set size affect power in relative tests?**

We were also interested in whether differential gene set sizes could potentially affect power and bias results when comparing sets of genes in a relative test. For example, in the relative test of the top candidate genes versus the set of genes related to height, does the discrepancy in gene set size (25 schizophrenia candidate genes vs. 258 height-related genes) negatively affect the power to detect a significant association in the smaller gene set? We did not expect differential gene set sizes to affect power of the relative test because gene set size is explicitly controlled for in the regression. Nevertheless, to test this possibility, we permuted sets of 25 genes from the full set of 258 height genes, performed a relative test in MAGMA comparing the association of the top 25 candidate genes with that of the set of 25 height genes, and repeated this process 1,000 times. The average  $p$ -value from these relative tests was 0.48, suggesting that the set of 25 historical candidate genes is not significantly more related to schizophrenia than random sets of 25 genes associated with height, and confirming what we found in the relative test comparing the 25 candidate genes with the 258 height-related genes ( $p$ -value = 0.39). This demonstrated that discrepancy in gene set size does not have a large effect on power in the relative tests, and did not influence our results.

### **What is the probability of having at least nine genes significantly associated with schizophrenia within sets of 25 randomly chosen genes?**

We also wanted to test whether the *number* of significant genes among our set of top 25 candidate genes was larger than expected by chance. In other words, in any given sample of 25 genes, how likely are there to be at least nine genes significantly associated with schizophrenia? To examine this question, we randomly sampled sets of 25 genes from across the genome, simply recorded the *M* number of genes with gene-level test statistics associated with schizophrenia at  $\alpha < 0.05$ , and repeated this procedure 1,000 times to create a distribution of the number of statistically significant genes in each random sample of 25 genes. As seen in Figure S6, finding nine genes significantly associated with schizophrenia within a random sample of 25 genes is not unexpected: 25.2% of the distribution lies above the nine-gene threshold.

### **Comparing the significance of the most associated historical candidate genes relative to other sets of significantly-associated genes throughout the genome**

While our study provides no robust evidence to support the notion that the aggregate set of 25 historical candidate genes harbors more causal variants for schizophrenia than other genes on average, one possible takeaway is that there *are* candidate genes worthy of follow-up (e.g. *NOTCH4*, *DRD2*) and thus the candidate gene enterprise has not failed on the whole. As described in the main text, to investigate this issue we performed a relative test in MAGMA of the 9 significant candidate genes versus all other genes significantly ( $p < .05$ ) related to schizophrenia in the genome, and found evidence that the strength of the associations of these 9 genes was greater than that among

other significant genes ( $\beta = 0.789$ ,  $SE = 0.28$ ,  $p = .005$ ). Results remained significant when we dropped MHC genes from both sets ( $\beta = 0.738$ ,  $SE = 0.32$ ,  $p = .02$ ) and when we compared the 7 significant non-MHC candidate genes to all other significantly related non-MHC synaptic genes ( $\beta = 0.896$ ,  $SE = 0.42$ ,  $p = .03$ ).

### **Analyses excluding genes originally studied because of evidence from prior linkage studies**

One possible comment on our analysis is that genes selected for further study because of their presence under a linkage peak could be expected to have more statistical evidence in their favor compared to candidate genes chosen due to their presence in interesting pharmacological pathways or role in biological hypotheses; perhaps these genes then are more likely to be driving the signal in the expanded 86-gene set.

However, while it is true that genes chosen from linkage studies do carry more statistical evidence than, say, a gene chosen because of involvement in an interesting biological pathway, linkage peaks tend to cover megabases (e.g. spanning up to 45 centimorgans (7)) of the genome, making it difficult to determine exactly which gene(s) under the linkage peak are truly responsible for any causal variation. Approximately 23% (20 of 86) of the genes in the expanded set ( $n_{\text{genes}} = 86$ ) were originally studied at least partly due to evidence from previous linkage studies, compared to about 28% (8 of 25) of the primary set of 25 historical candidate genes (from Table 1 of Farrell *et al.* 2015). To explicitly test whether these genes chosen because of evidence from linkage studies were the ones driving the signal in the expanded 86-gene gene set, we re-ran



the gene set analyses (using the primary test statistic, the  $\text{sum}(-\log(p))$ ) with the 86 genes minus the 20 genes from linkage analyses and the 25 top genes minus the 8 genes from linkage analyses - results are included in Supplemental Table S4. The conclusions did not change - the set of 66 candidate genes were significantly more associated with schizophrenia, both compared to the rest of the genome and relative to the set of genes involved in Type 2 diabetes, while the set of 17 historical candidate genes not motivated by linkage showed no evidence for association with schizophrenia.

### **Comparing gene-level $p$ -values from MAGMA and VEGAS2**

In order to confirm that our results were relatively robust to the gene set method of choice, we also calculated gene-level test statistics and  $p$ -values using the VEGAS2 version 2 software (8). Tables S5 and S6 compare the results from MAGMA and VEGAS2 for the top 25 historical candidate genes. The  $-\log_{10}(p\text{-values})$  did not differ greatly between the methods, though there was some variation, particularly for *NOTCH4* and *DRD2*. In most discrepancies, the  $p$ -value from MAGMA was smaller than that from VEGAS2.

**Supplementary Table S1. Descriptives of the top 86 most-studied candidate genes.** Included are all candidate genes studied more than five times and not motivated by GWAS results. The average numbers of cases and controls were calculated from the SZGene database, excluding GWAS and family-based studies. Gene rankings are based on the genes' z statistics from MAGMA, which quantify each gene's association with schizophrenia.

| Gene            | NCBI_Entrez_ID | Average Number of Cases | Average Number of Controls | Association Statistic (z) from MAGMA | Rank (Including MHC) |
|-----------------|----------------|-------------------------|----------------------------|--------------------------------------|----------------------|
| <i>NOTCH4</i>   | 4855           | 208                     | 285                        | 8.78                                 | 18                   |
| <i>SRR</i>      | 63826          | 266                     | 273                        | 6.36                                 | 232                  |
| <i>DRD2</i>     | 1813           | 196                     | 266                        | 5.92                                 | 278                  |
| <i>NOS1</i>     | 4842           | 343                     | 402                        | 5.58                                 | 338                  |
| <i>CYP2D6</i>   | 1565           | 154                     | 192                        | 5.54                                 | 346                  |
| <i>KCNN3</i>    | 3782           | 154                     | 154                        | 5.03                                 | 477                  |
| <i>ERBB4</i>    | 2066           | 376                     | 565                        | 4.95                                 | 496                  |
| <i>GRM3</i>     | 2913           | 590                     | 678                        | 4.60                                 | 624                  |
| <i>TNF</i>      | 7124           | 159                     | 214                        | 4.28                                 | 762                  |
| <i>PDE4B</i>    | 5142           | 329                     | 399                        | 4.23                                 | 789                  |
| <i>ZDHHC8</i>   | 29801          | 303                     | 401                        | 4.11                                 | 871                  |
| <i>PPP3CC</i>   | 5533           | 683                     | 763                        | 3.47                                 | 1420                 |
| <i>PPP1R1B</i>  | 84152          | 294                     | 423                        | 3.25                                 | 1658                 |
| <i>EGF</i>      | 1950           | 193                     | 296                        | 3.15                                 | 1802                 |
| <i>ATXN1</i>    | 6310           | 110                     | 172                        | 3.12                                 | 1841                 |
| <i>BDNF</i>     | 627            | 243                     | 292                        | 3.01                                 | 1985                 |
| <i>GRIN2B</i>   | 2904           | 195                     | 214                        | 2.96                                 | 2065                 |
| <i>TPH1</i>     | 7166           | 260                     | 360                        | 2.79                                 | 2325                 |
| <i>NR4A2</i>    | 4929           | 205                     | 201                        | 2.74                                 | 2404                 |
| <i>ACE</i>      | 1636           | 198                     | 246                        | 2.67                                 | 2518                 |
| <i>FZD3</i>     | 7976           | 279                     | 370                        | 2.53                                 | 2798                 |
| <i>RTN4</i>     | 57142          | 235                     | 285                        | 2.44                                 | 2961                 |
| <i>CLDN5</i>    | 7122           | 371                     | 420                        | 2.40                                 | 3050                 |
| <i>DGCR2</i>    | 9993           | 661                     | 737                        | 2.36                                 | 3121                 |
| <i>DRD5</i>     | 1816           | 175                     | 259                        | 2.31                                 | 3255                 |
| <i>GC</i>       | 2638           | 275                     | 771                        | 2.13                                 | 3737                 |
| <i>NTF3</i>     | 4908           | 128                     | 130                        | 2.11                                 | 3780                 |
| <i>DAO</i>      | 1610           | 440                     | 542                        | 1.87                                 | 4504                 |
| <i>CHRFAM7A</i> | 89832          | 119                     | 116                        | 1.77                                 | 4863                 |
| <i>SYN3</i>     | 8224           | 292                     | 330                        | 1.66                                 | 5241                 |
| <i>SLC6A4</i>   | 6532           | 173                     | 207                        | 1.64                                 | 5314                 |

| Gene           | NCBI_Entrez_ID | Average Number of Cases | Average Number of Controls | Association Statistic (z) from MAGMA | Rank (Including MHC) |
|----------------|----------------|-------------------------|----------------------------|--------------------------------------|----------------------|
| <i>ARVCF</i>   | 421            | 262                     | 376                        | 1.59                                 | 5473                 |
| <i>RELN</i>    | 5649           | 319                     | 474                        | 1.57                                 | 5592                 |
| <i>TSNAX</i>   | 7257           | 385                     | 386                        | 1.39                                 | 6286                 |
| <i>GRIN1</i>   | 2902           | 204                     | 226                        | 1.38                                 | 6380                 |
| <i>SOD2</i>    | 6648           | 203                     | 267                        | 1.23                                 | 6997                 |
| <i>MLC1</i>    | 23209          | 157                     | 258                        | 1.23                                 | 7039                 |
| <i>MTHFR</i>   | 4524           | 221                     | 290                        | 1.20                                 | 7139                 |
| <i>TP53</i>    | 7157           | 359                     | 307                        | 1.16                                 | 7311                 |
| <i>SNAP25</i>  | 6616           | 322                     | 369                        | 1.15                                 | 7357                 |
| <i>HP</i>      | 3240           | 233                     | 315                        | 1.09                                 | 7654                 |
| <i>NPY</i>     | 4852           | 204                     | 263                        | 1.04                                 | 7923                 |
| <i>TAAR6</i>   | 319100         | 440                     | 578                        | 1.01                                 | 8075                 |
| <i>GAD1</i>    | 2571           | 218                     | 268                        | 0.97                                 | 8276                 |
| <i>GRIK3</i>   | 2899           | 191                     | 253                        | 0.93                                 | 8481                 |
| <i>HTR6</i>    | 3362           | 146                     | 155                        | 0.86                                 | 8847                 |
| <i>COMT</i>    | 1312           | 238                     | 383                        | 0.85                                 | 8858                 |
| <i>DDC</i>     | 1644           | 163                     | 218                        | 0.82                                 | 9009                 |
| <i>HTR1B</i>   | 3351           | 162                     | 264                        | 0.75                                 | 9386                 |
| <i>CNR1</i>    | 1268           | 194                     | 229                        | 0.72                                 | 9555                 |
| <i>NOS1AP</i>  | 9722           | 293                     | 427                        | 0.61                                 | 10057                |
| <i>ERBB3</i>   | 2065           | 279                     | 527                        | 0.57                                 | 10281                |
| <i>YWHAH</i>   | 7533           | 198                     | 264                        | 0.49                                 | 10744                |
| <i>DRD1</i>    | 1812           | 178                     | 251                        | 0.42                                 | 11121                |
| <i>RGS4</i>    | 5999           | 401                     | 497                        | 0.42                                 | 11122                |
| <i>ATN1</i>    | 1822           | 54                      | 42                         | 0.29                                 | 11869                |
| <i>TF</i>      | 7018           | 278                     | 530                        | 0.25                                 | 12081                |
| <i>DBH</i>     | 1621           | 131                     | 180                        | 0.19                                 | 12384                |
| <i>MAOA</i>    | 4128           | 84                      | 114                        | 0.14                                 | 12658                |
| <i>DRD3</i>    | 1814           | 168                     | 198                        | 0.11                                 | 12865                |
| <i>AKT1</i>    | 207            | 458                     | 539                        | 0.07                                 | 13063                |
| <i>DRD4</i>    | 1815           | 202                     | 227                        | 0.06                                 | 13119                |
| <i>NRG1</i>    | 3084           | 383                     | 489                        | 0.03                                 | 13253                |
| <i>CNTF</i>    | 1270           | 159                     | 209                        | -0.05                                | 13674                |
| <i>PLA2G4A</i> | 5321           | 150                     | 215                        | -0.12                                | 14053                |
| <i>MAOB</i>    | 4129           | 105                     | 115                        | -0.13                                | 14105                |
| <i>PRODH</i>   | 5625           | 235                     | 320                        | -0.16                                | 14272                |
| <i>DTNBP1</i>  | 84062          | 385                     | 436                        | -0.30                                | 14958                |

| <b>Gene</b>    | <b>NCBI_Entrez_ID</b> | <b>Average Number of Cases</b> | <b>Average Number of Controls</b> | <b>Association Statistic (z) from MAGMA</b> | <b>Rank (Including MHC)</b> |
|----------------|-----------------------|--------------------------------|-----------------------------------|---------------------------------------------|-----------------------------|
| <i>SLC18A1</i> | 6570                  | 187                            | 281                               | -0.30                                       | 14972                       |
| <i>HTR2A</i>   | 3356                  | 215                            | 224                               | -0.32                                       | 15073                       |
| <i>CCKAR</i>   | 886                   | 175                            | 321                               | -0.32                                       | 15093                       |
| <i>PIP5K2A</i> | 5305                  | 250                            | 381                               | -0.44                                       | 15664                       |
| <i>CHRNA7</i>  | 1139                  | 302                            | 316                               | -0.59                                       | 16327                       |
| <i>IL1RN</i>   | 3557                  | 214                            | 282                               | -0.60                                       | 16384                       |
| <i>DISC1</i>   | 27185                 | 348                            | 416                               | -0.66                                       | 16597                       |
| <i>HTR2C</i>   | 3358                  | 103                            | 160                               | -0.76                                       | 16983                       |
| <i>IPO5</i>    | 3843                  | 385                            | 557                               | -0.81                                       | 17152                       |
| <i>TH</i>      | 7054                  | 201                            | 259                               | -0.82                                       | 17199                       |
| <i>DAOA</i>    | 267012                | 393                            | 526                               | -0.83                                       | 17225                       |
| <i>SLC6A3</i>  | 6531                  | 180                            | 234                               | -0.91                                       | 17508                       |
| <i>IL10</i>    | 3586                  | 243                            | 248                               | -0.94                                       | 17590                       |
| <i>CNP</i>     | 1267                  | 466                            | 584                               | -0.94                                       | 17596                       |
| <i>GABRB2</i>  | 2561                  | 192                            | 230                               | -1.05                                       | 17876                       |
| <i>IL1B</i>    | 3553                  | 159                            | 242                               | -1.16                                       | 18118                       |
| <i>GSK3B</i>   | 2932                  | 339                            | 438                               | -1.28                                       | 18355                       |
| <i>APOE</i>    | 348                   | 143                            | 211                               | -1.30                                       | 18380                       |

**Supplementary Table S2. MAGMA gene set analyses, using the minimum p-value as the gene-level test statistic.** All tests controlled for gene size, SNP density, and minor allele count (MAC) (as well as the log(gene size), log(SNP density), and log(MAC).) P-values in bold and starred are significant at  $\alpha < 0.05$ .

| Model | Target Gene Set                 | Comparison Gene Set                  | (+/- 25 kb window) |         | (strict gene boundaries) |               |
|-------|---------------------------------|--------------------------------------|--------------------|---------|--------------------------|---------------|
|       |                                 |                                      | Beta (SE)          | P-value | Beta (SE)                | P-value       |
| 1     | Historical 25 candidate genes   | All other genes                      | 0.15 (0.18)        | 0.21    | 0.21 (0.21)              | 0.15          |
| 2     | Historical 25 candidate genes   | Height associated genes              | 0.18 (0.20)        | 0.36    | 0.29 (0.22)              | 0.19          |
| 3     | Historical 25 candidate genes   | Type 2 Diabetes associated genes     | -0.06 (0.23)       | 0.80    | -0.12 (0.25)             | 0.64          |
| 4     | Historical 25 candidate genes   | Genes involved in synaptic processes | 0.08 (0.19)        | 0.68    | 0.12 (0.21)              | 0.55          |
| 5     | 86 most-studied candidate genes | All other genes                      | 0.15 (0.10)        | 0.07    | <b>0.20 (0.12)</b>       | <b>0.048*</b> |
| 6     | 86 most-studied candidate genes | Height associated genes              | 0.19 (0.12)        | 0.12    | <b>0.28 (0.14)</b>       | <b>0.047*</b> |
| 7     | 86 most-studied candidate genes | Type 2 Diabetes associated genes     | -0.03 (0.18)       | 0.86    | -0.09 (0.19)             | 0.64          |
| 8     | 86 most-studied candidate genes | Genes involved in synaptic processes | 0.08 (0.11)        | 0.43    | 0.11 (0.12)              | 0.39          |

| Model | Target Gene Set                                 | Comparison Gene Set                  | (+/- 25 kb window) |         | (strict gene boundaries) |              |
|-------|-------------------------------------------------|--------------------------------------|--------------------|---------|--------------------------|--------------|
|       |                                                 |                                      | Beta (SE)          | P-value | Beta (SE)                | P-value      |
| 9     | Historical 25 candidate genes minus MHC genes   | All other genes                      | 0.04 (0.19)        | 0.42    | 0.31 (0.21)              | 0.07         |
| 10    | Historical 25 candidate genes minus MHC genes   | Height associated genes              | 0.05 (0.20)        | 0.81    | 0.33 (0.23)              | 0.15         |
| 11    | Historical 25 candidate genes minus MHC genes   | Type 2 Diabetes associated genes     | -0.14 (0.24)       | 0.56    | -0.02 (0.26)             | 0.94         |
| 12    | Historical 25 candidate genes minus MHC genes   | Genes involved in synaptic processes | -0.03 (0.27)       | 0.88    | 0.22 (0.22)              | 0.30         |
| 13    | 86 Most-studied candidate genes minus MHC genes | All other genes                      | 0.14 (0.10)        | 0.09    | <b>0.24 (0.12)</b>       | <b>0.02*</b> |
| 14    | 86 Most-studied candidate genes minus MHC genes | Height associated genes              | 0.15 (0.12)        | 0.21    | 0.26 (0.14)              | 0.06         |
| 15    | 86 Most-studied candidate genes minus MHC genes | Type 2 Diabetes associated genes     | -0.02 (0.17)       | 0.90    | -0.04 (0.19)             | 0.83         |
| 16    | 86 Most-studied candidate genes minus MHC genes | Genes involved in synaptic processes | 0.07 (0.11)        | 0.51    | 0.15 (0.12)              | 0.22         |

**Supplementary Table S3. MAGMA gene set analyses, using a strict gene boundary.** These tests used the sum of the negative log of the p-values as the gene-level test statistic. All tests controlled for gene size, SNP density, and minor allele count (MAC) (as well as the log(gene size), log(SNP density), and log(MAC).) P-values in bold and starred are significant at  $\alpha < 0.05$ .

| Model | Target Gene Set                                  | Comparison Gene Set                  | Beta (SE)          | P-value      |
|-------|--------------------------------------------------|--------------------------------------|--------------------|--------------|
| 1     | Historical 25 candidate genes                    | All other genes                      | 0.27 (0.21)        | 0.10         |
| 2     | Historical 25 candidate genes                    | Height associated genes              | 0.16 (0.23)        | 0.49         |
| 3     | Historical 25 candidate genes                    | Type 2 Diabetes associated genes     | 0.28 (0.27)        | 0.29         |
| 4     | Historical 25 candidate genes                    | Genes involved in synaptic processes | 0.17 (0.22)        | 0.43         |
| 5     | 86 most-studied candidate genes                  | All other genes                      | <b>0.26 (0.12)</b> | <b>0.01*</b> |
| 6     | 86 most-studied candidate genes                  | Height associated genes              | 0.15 (0.14)        | 0.29         |
| 7     | 86 most-studied candidate genes                  | Type 2 Diabetes associated genes     | 0.37 (0.20)        | 0.07         |
| 8     | 86 most-studied candidate genes                  | Genes involved in synaptic processes | 0.16 (0.12)        | 0.19         |
| 9     | Historical 25 candidate genes<br>minus MHC genes | All other genes                      | 0.34 (0.23)        | 0.07         |
| 10    | Historical 25 candidate genes<br>minus MHC genes | Height associated genes              | 0.23 (0.24)        | 0.34         |

| Model | Target Gene Set                                    | Comparison Gene Set                  | Beta (SE)          | P-value       |
|-------|----------------------------------------------------|--------------------------------------|--------------------|---------------|
| 11    | Historical 25 candidate genes<br>minus MHC genes   | Type 2 Diabetes associated genes     | 0.34 (0.28)        | 0.22          |
| 12    | Historical 25 candidate genes<br>minus MHC genes   | Genes involved in synaptic processes | 0.23 (0.23)        | 0.31          |
| 13    | 86 Most-studied candidate genes<br>minus MHC genes | All other genes                      | <b>0.28 (0.12)</b> | <b>0.009*</b> |
| 14    | 86 Most-studied candidate genes<br>minus MHC genes | Height associated genes              | 0.18 (0.14)        | 0.22          |
| 15    | 86 Most-studied candidate genes<br>minus MHC genes | Type 2 Diabetes associated genes     | 0.38 (0.20)        | 0.06          |
| 16    | 86 Most-studied candidate genes<br>minus MHC genes | Genes involved in synaptic processes | 0.17 (0.12)        | 0.16          |



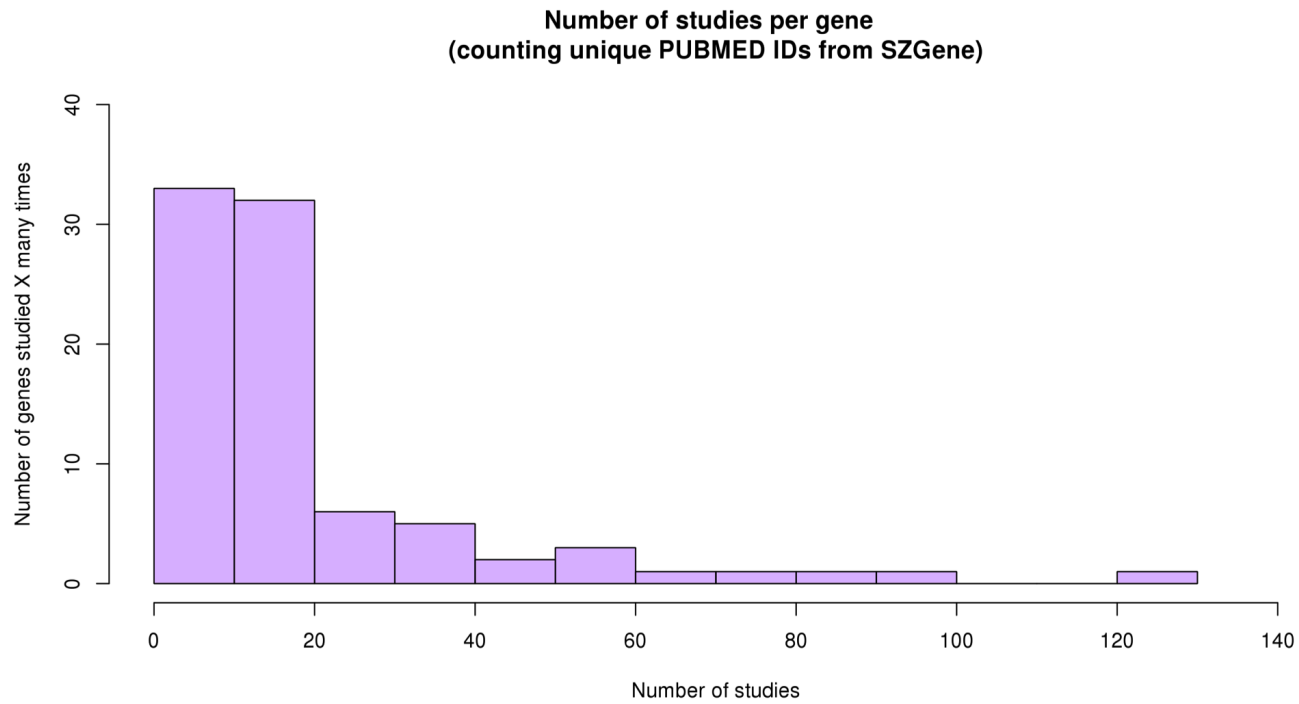

**Supplemental Figure S1. Distribution of the number of studies per gene for the 86 candidate genes studied more than five times and not motivated by GWAS.**

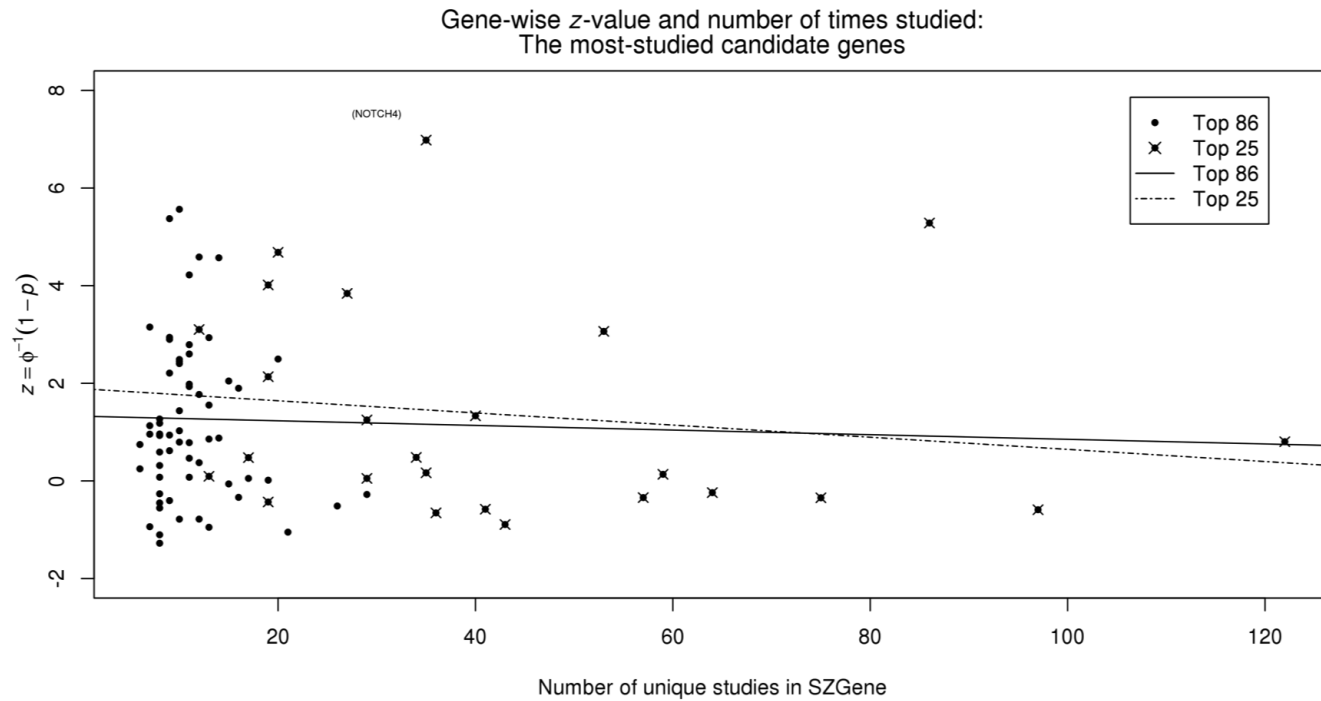

**Supplemental Figure S2. Is a gene's association with schizophrenia correlated with how often it has been studied?** Plot of the correlation of the gene-wise Z-value from MAGMA's gene-level analysis for the top 86 most-studied candidate genes and the number of times each gene was studied. This relationship was not statistically significant ( $r = -0.06$ ,  $p = 0.61$ ).

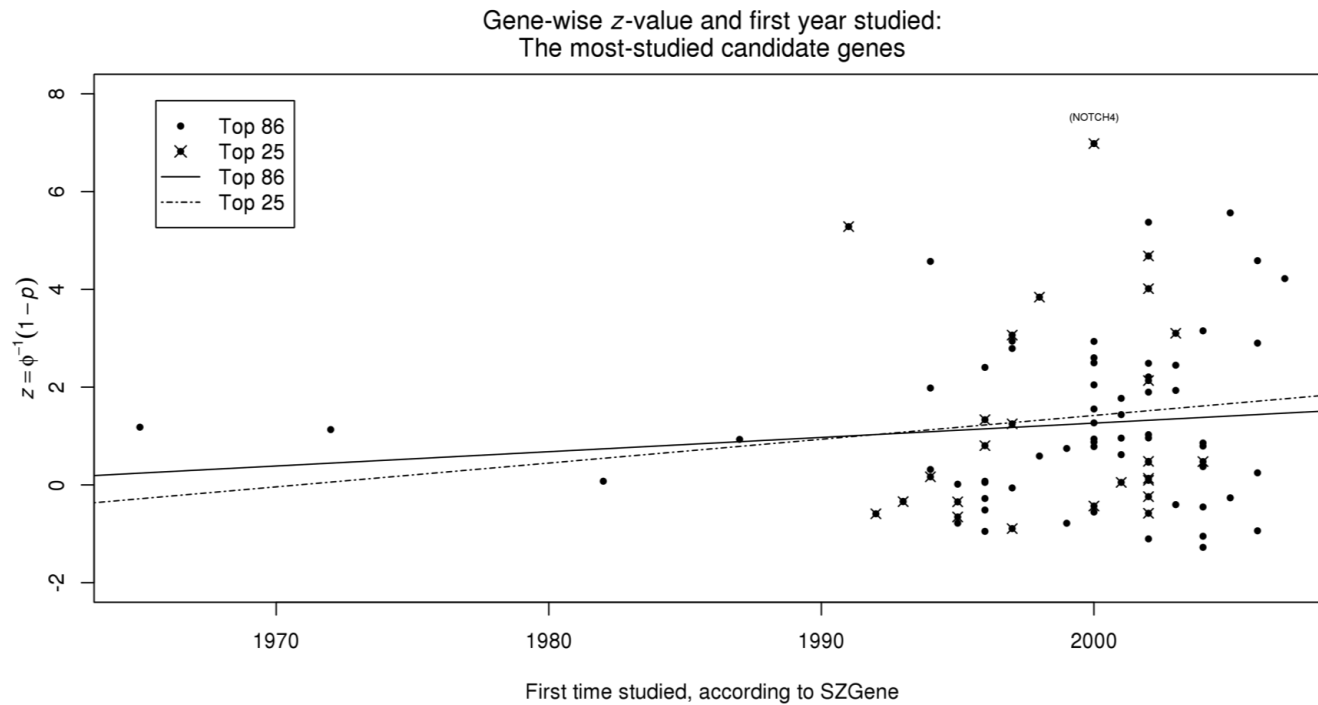

**Supplemental Figure S3. Are candidate genes first investigated more recently more likely to be associated with schizophrenia?** Plot of the correlation of the gene-wise Z-value from MAGMA's gene-level analysis for the top 86 most-studied candidate genes and the first year each gene was studied, according to the SZGene database records. This relationship was not statistically significant ( $r = 0.11$ ,  $p = 0.34$ ).

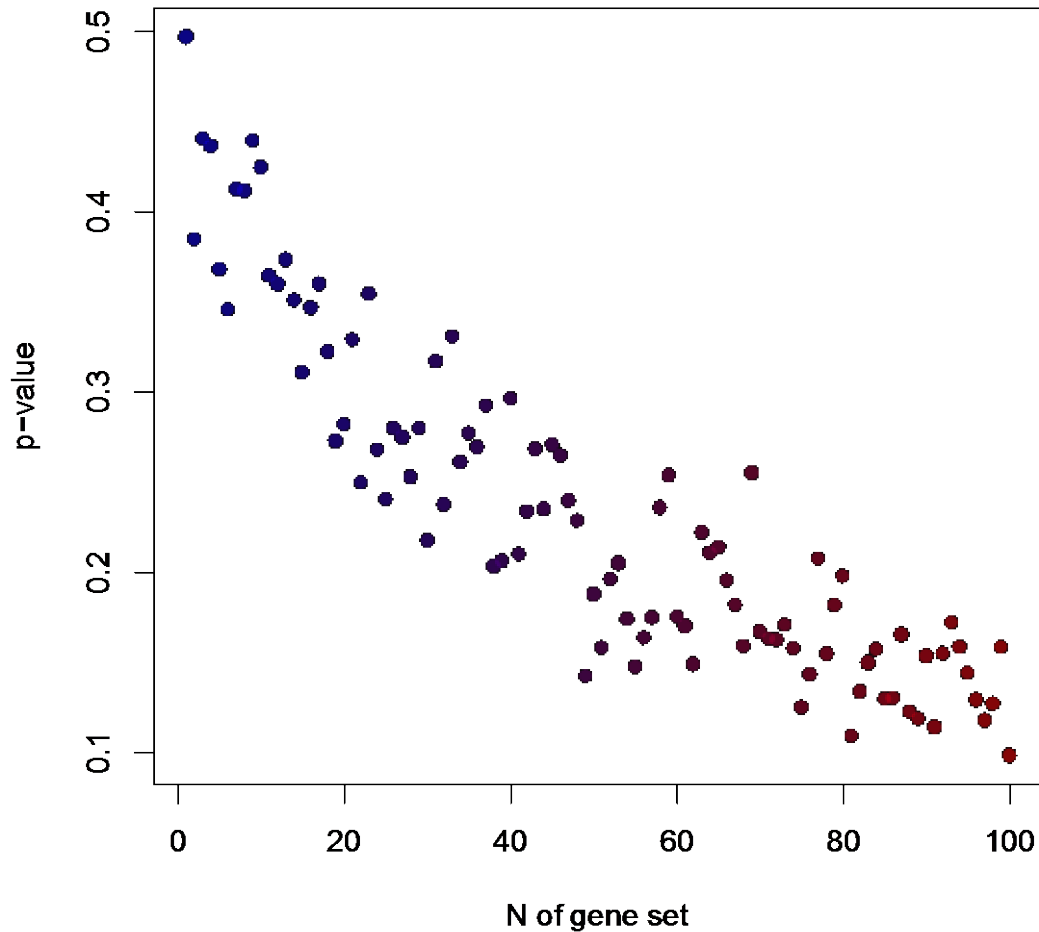

**Supplemental Figure S4. Examining effect of gene set size on power of competitive gene set analysis.** Gene sets were created by randomly sampling  $n$  from 1 to 100 genes from the full set of genes involved in synaptic processes (taken from Ruano et al. (5) and Lips et al. (6)) and then performing a basic competitive gene set test in MAGMA, with the randomly sampled synaptic genes grouped as the gene set of interest and all other non-synaptic genes in the genome used as the comparison set. This sampling process was repeated 5,000 times and the gene set  $p$ -value returned from MAGMA recorded for each of the iterations (i.e., there were approximately 50  $p$ -values for each size gene set from 1 to 100). The plot below shows the average gene-set analysis  $p$ -value for each size of gene set, from  $n = 1$  to  $n = 100$ . At least for the set of genes involved in pre- and post-synaptic processes, there is evidence that increasing the size of the gene set increases the power of MAGMA's test (correlation between average  $p$ -value and gene set size  $n$ :  $r = -0.90$ ,  $p = 2.2e-16$ ).

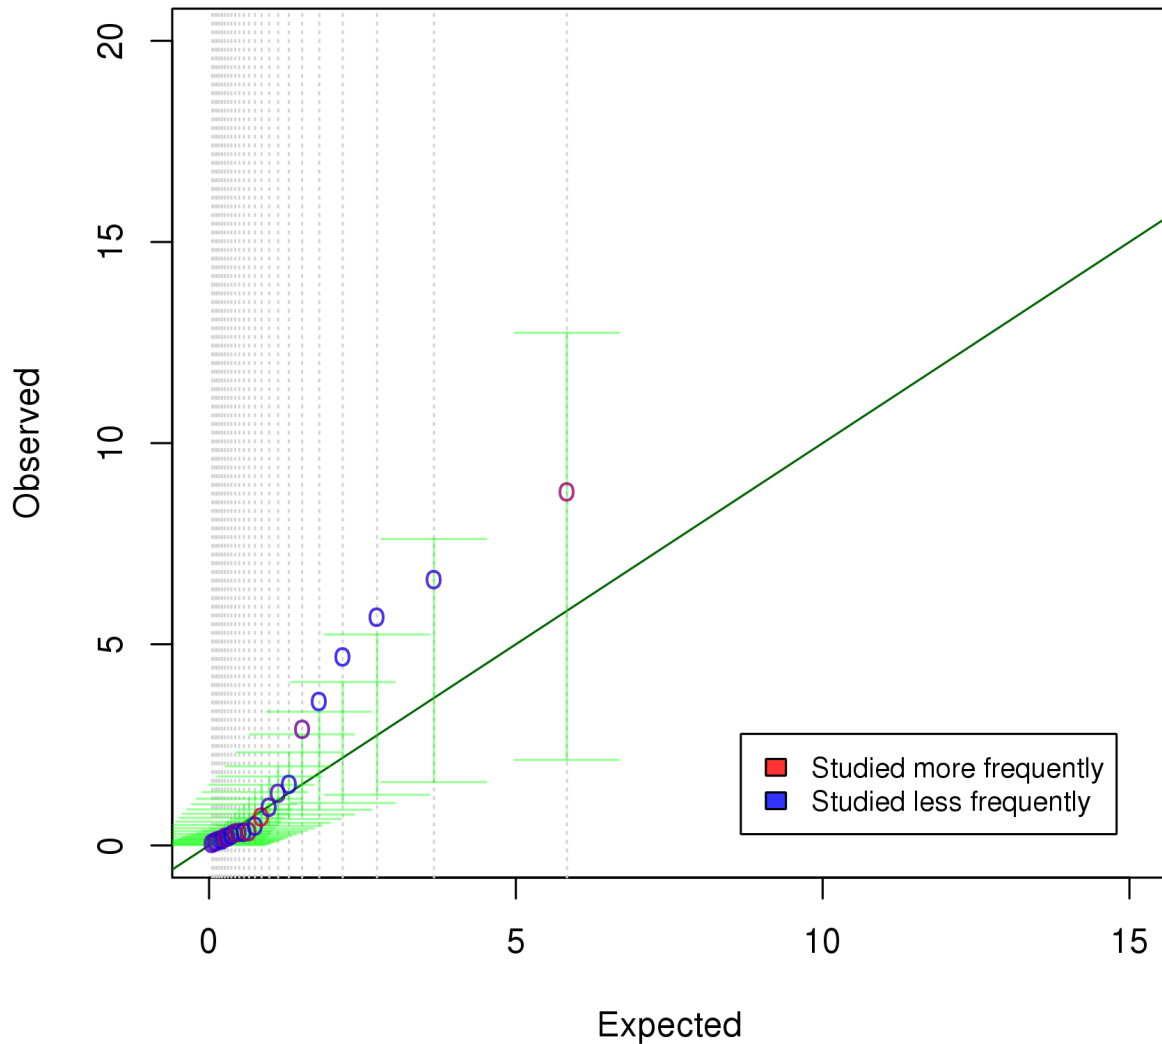

**Supplemental Figure S5. Quantile-quantile plot of the  $-\log_{10} p$ -values from the 25 most-studied candidate genes, excluding any genes located in the MHC region.** Observed gene-level  $-\log_{10} p$ -values from MAGMA are plotted on the y-axis, with expected  $-\log_{10} p$ -values plotted on the x-axis. Points are heat map colored according to the number of times each gene has been studied, and the vertical green lines are bootstrapped 95% confidence intervals.

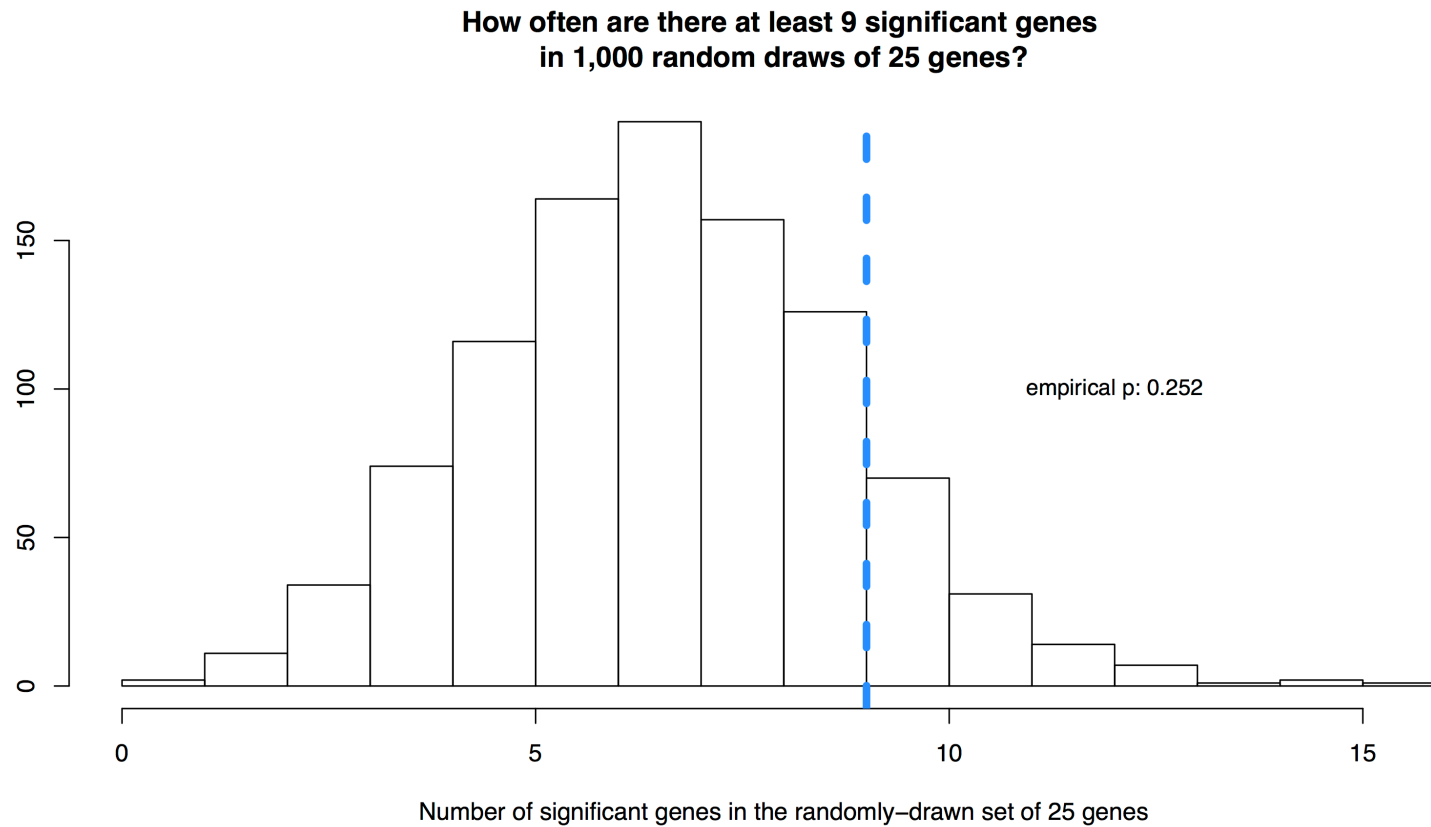

**Supplemental Figure S6. The distribution of the number of significant ( $\alpha < 0.05$ ) genes found in random samples of 25 genes.** Although there was little evidence that the set of candidate genes as a group is highly related to schizophrenia, there were 9 genes in the set of 25 candidates with significant ( $p < .05$ ) associations with schizophrenia. To understand how surprising this result is for a highly polygenic trait such as schizophrenia, we permuted sets of 25 genes from the entire genome and observed 9 or more nominally significant genes in 25.2% of permutations (a one-tailed empirical  $p$ -value).

**Supplementary Table S4. MAGMA gene set analyses, not including genes chosen from linkage studies.** These tests used the sum of the negative log of the p-values as the gene-level test statistic. All tests controlled for gene size, SNP density, and minor allele count (MAC) (as well as the log(gene size), log(SNP density), and log(MAC).) P-values in bold and starred are significant at  $\alpha < 0.05$ .

| Model | Target Gene Set                                          | Comparison Gene Set                  | (+/- 25 kb window) |              | (strict gene boundaries) |              |
|-------|----------------------------------------------------------|--------------------------------------|--------------------|--------------|--------------------------|--------------|
|       |                                                          |                                      | Beta (SE)          | P-value      | Beta (SE)                | P-value      |
| 1     | Historical 17 candidate genes not motivated by linkage   | All other genes                      | 0.38 (0.31)        | 0.11         | 0.33 (0.25)              | 0.09         |
| 2     | Historical 17 candidate genes not motivated by linkage   | Height associated genes              | 0.33 (0.32)        | 0.30         | 0.22 (0.26)              | 0.39         |
| 3     | Historical 17 candidate genes not motivated by linkage   | Type 2 Diabetes associated genes     | 0.49 (0.35)        | 0.15         | 0.35 (0.30)              | 0.24         |
| 4     | Historical 17 candidate genes not motivated by linkage   | Genes involved in synaptic processes | 0.25 (0.31)        | 0.42         | 0.23 (0.25)              | 0.35         |
| 5     | 66 most-studied candidate genes not motivated by linkage | All other genes                      | <b>0.31 (0.14)</b> | <b>0.01*</b> | <b>0.32 (0.13)</b>       | <b>0.009</b> |
| 6     | 66 most-studied candidate genes not motivated by linkage | Height associated genes              | 0.26 (0.16)        | 0.11         | 0.20 (0.15)              | 0.18         |

| Model | Target Gene Set                                          | Comparison Gene Set                  | (+/- 25 kb window) |              | (strict gene boundaries) |              |
|-------|----------------------------------------------------------|--------------------------------------|--------------------|--------------|--------------------------|--------------|
|       |                                                          |                                      | Beta (SE)          | P-value      | Beta (SE)                | P-value      |
| 7     | 66 most-studied candidate genes not motivated by linkage | Type 2 Diabetes associated genes     | <b>0.52 (0.21)</b> | <b>0.02*</b> | <b>0.42 (0.21)</b>       | <b>0.04*</b> |
| 8     | 66 most-studied candidate genes not motivated by linkage | Genes involved in synaptic processes | 0.17 (0.15)        | 0.24         | 0.22 (0.14)              | 0.11         |



**Supplementary Table S5. Comparison of VEGAS2 version 2 gene-based test with MAGMA results – strict gene boundary.** The MAGMA results are from the gene-level test with a strict gene boundary (not including the +/- 25kb regions upstream or downstream) and used the sum of the negative log of the p-values as the gene-level test statistic. The VEGAS results are from the VEGAS2 version 2 gene-level test, with all parameters set to the program defaults. The correlation between the VEGAS2 and MAGMA  $-\log_{10}(p)$  was +.962.

| Gene          | Chr | Gene Start Position | Gene Stop Position | nSNPs (VEGAS2) | $-\log_{10}(P_{VEGAS2})$ | nSNPs (MAGMA) | $-\log_{10}(P_{MAGMA})$ | $-\log_{10}(P_{VEGAS2}) + \log_{10}(P_{MAGMA})$ |
|---------------|-----|---------------------|--------------------|----------------|--------------------------|---------------|-------------------------|-------------------------------------------------|
| <i>AKT1</i>   | 14  | 105235686           | 105262080          | 68             | 0.481                    | 68            | 0.500                   | -0.019                                          |
| <i>APOE</i>   | 19  | 45409039            | 45412650           | 6              | 0.111                    | 6             | 0.129                   | -0.018                                          |
| <i>BDNF</i>   | 11  | 27676440            | 27743605           | 120            | 2.712                    | 120           | 2.962                   | -0.249                                          |
| <i>CHRNA7</i> | 15  | 32322691            | 32462384           | 295            | 0.135                    | 295           | 0.176                   | -0.041                                          |
| <i>COMT</i>   | 22  | 19929263            | 19957498           | 129            | 0.664                    | 129           | 0.676                   | -0.012                                          |
| <i>DAO</i>    | 12  | 109273857           | 109294710          | 76             | 1.603                    | 75            | 1.785                   | -0.183                                          |
| <i>DAOA</i>   | 13  | 106118216           | 106143383          | 125            | 0.149                    | 125           | 0.143                   | 0.005                                           |
| <i>DISC1</i>  | 1   | 231762561           | 232177018          | 1191           | 0.176                    | 1191          | 0.089                   | 0.086                                           |
| <i>DRD2</i>   | 11  | 113280317           | 113346001          | 177            | 5.699                    | 177           | 7.199                   | -1.500                                          |
| <i>DRD3</i>   | 3   | 113847557           | 113897899          | 125            | 0.126                    | 125           | 0.141                   | -0.015                                          |
| <i>DRD4</i>   | 11  | 637305              | 640706             | 12             | 0.393                    | 11            | 0.198                   | 0.195                                           |
| <i>DTNBP1</i> | 6   | 15523032            | 15663289           | 335            | 0.407                    | 335           | 0.351                   | 0.057                                           |
| <i>GRM3</i>   | 7   | 86273230            | 86494192           | 454            | 4.444                    | 454           | 5.849                   | -1.406                                          |
| <i>HTR2A</i>  | 13  | 47407513            | 47471169           | 243            | 0.239                    | 242           | 0.197                   | 0.041                                           |

| Gene          | Chr | Gene Start Position | Gene Stop Position | nSNPs (VEGAS2) | $-\log_{10}(P_{VEGAS2})$ | nSNPs (MAGMA) | $-\log_{10}(P_{MAGMA})$ | $-\log_{10}(P_{VEGAS2}) + \log_{10}(P_{MAGMA})$ |
|---------------|-----|---------------------|--------------------|----------------|--------------------------|---------------|-------------------------|-------------------------------------------------|
| <i>KCNN3</i>  | 1   | 154669938           | 154842754          | 536            | 3.633                    | 536           | 4.213                   | -0.580                                          |
| <i>MTHFR</i>  | 1   | 11845787            | 11866160           | 86             | 0.963                    | 84            | 0.976                   | -0.013                                          |
| <i>NOTCH4</i> | 6   | 32162620            | 32191844           | 128            | 6.000                    | 128           | 11.836                  | -5.836                                          |
| <i>NRG1</i>   | 8   | 31496820            | 32622558           | 3783           | 0.275                    | 3783          | 0.226                   | 0.050                                           |
| <i>PPP3CC</i> | 8   | 22298596            | 22398638           | 187            | 2.663                    | 187           | 3.017                   | -0.354                                          |
| <i>PRODH</i>  | 22  | 18900287            | 18924066           | 128            | 0.336                    | 128           | 0.335                   | 0.001                                           |
| <i>RGS4</i>   | 1   | 163038396           | 163046592          | 17             | 0.608                    | 17            | 0.502                   | 0.106                                           |
| <i>SLC6A3</i> | 5   | 1392905             | 1445543            | 196            | 0.472                    | 196           | 0.362                   | 0.109                                           |
| <i>SLC6A4</i> | 17  | 28523376            | 28562954           | 71             | 1.126                    | 71            | 1.040                   | 0.086                                           |
| <i>TNF</i>    | 6   | 31543350            | 31546112           | 5              | 0.371                    | 5             | 0.319                   | 0.052                                           |
| <i>ZDHHC8</i> | 22  | 20119364            | 20135530           | 50             | 3.866                    | 50            | 4.525                   | -0.659                                          |

**Supplementary Table S6. Comparison of VEGAS2 version 2 gene-based test with MAGMA results – +/- 25kb region around gene boundaries.** The MAGMA results are from the gene-level test with extended gene boundaries (including the +/- 25kb regions upstream or downstream of gene start and end points) and used the sum of the negative log of the p-values as the gene-level test statistic. The VEGAS results are from the VEGAS2 version 2 gene-level test, with all parameters set to the program defaults except for the addition of the –upper and –lower flags specifying the 25kb region upstream and downstream of the gene start and end points.

| Gene          | Chr | Gene Start Position | Gene Stop Position | nSNPs (VEGAS2) | $-\log_{10}(P_{VEGAS2})$ | nSNPs (MAGMA) | $-\log_{10}(P_{MAGMA})$ | $\frac{-\log_{10}(P_{VEGAS2}) + \log_{10}(P_{MAGMA})}{2}$ |
|---------------|-----|---------------------|--------------------|----------------|--------------------------|---------------|-------------------------|-----------------------------------------------------------|
| <i>AKT1</i>   | 14  | 105235686           | 105262080          | 202            | 0.330                    | 202           | 0.325                   | 0.005                                                     |
| <i>APOE</i>   | 19  | 45409039            | 45412650           | 136            | 0.029                    | 136           | 0.044                   | -0.015                                                    |
| <i>BDNF</i>   | 11  | 27676440            | 27743605           | 224            | 2.569                    | 224           | 2.886                   | -0.318                                                    |
| <i>CHRNA7</i> | 15  | 32322691            | 32462384           | 387            | 0.134                    | 387           | 0.141                   | -0.007                                                    |
| <i>COMT</i>   | 22  | 19929263            | 19957498           | 360            | 0.648                    | 360           | 0.707                   | -0.059                                                    |
| <i>DAO</i>    | 12  | 109273857           | 109294710          | 243            | 1.459                    | 243           | 1.515                   | -0.056                                                    |
| <i>DAOA</i>   | 13  | 106118216           | 106143383          | 292            | 0.114                    | 292           | 0.099                   | 0.015                                                     |
| <i>DISC1</i>  | 1   | 231762561           | 232177018          | 1368           | 0.151                    | 1368          | 0.128                   | 0.023                                                     |
| <i>DRD2</i>   | 11  | 113280317           | 113346001          | 316            | 6.000                    | 316           | 8.796                   | -2.796                                                    |
| <i>DRD3</i>   | 3   | 113847557           | 113897899          | 292            | 0.370                    | 292           | 0.340                   | 0.030                                                     |
| <i>DRD4</i>   | 11  | 637305              | 640706             | 238            | 0.410                    | 238           | 0.321                   | 0.089                                                     |
| <i>DTNBP1</i> | 6   | 15523032            | 15663289           | 485            | 0.271                    | 485           | 0.210                   | 0.061                                                     |
| <i>GRM3</i>   | 7   | 86273230            | 86494192           | 560            | 4.167                    | 560           | 5.666                   | -1.499                                                    |

| Gene          | Chr | Gene Start Position | Gene Stop Position | nSNPs (VEGAS2) | $-\log_{10}(P_{\text{VEGAS2}})$ | nSNPs (MAGMA) | $-\log_{10}(P_{\text{MAGMA}})$ | $\frac{-\log_{10}(P_{\text{VEGAS2}}) + \log_{10}(P_{\text{MAGMA}})}{2}$ |
|---------------|-----|---------------------|--------------------|----------------|---------------------------------|---------------|--------------------------------|-------------------------------------------------------------------------|
| <i>HTR2A</i>  | 13  | 47407513            | 47471169           | 385            | 0.263                           | 385           | 0.205                          | 0.059                                                                   |
| <i>KCNN3</i>  | 1   | 154669938           | 154842754          | 638            | 4.959                           | 638           | 6.600                          | -1.641                                                                  |
| <i>MTHFR</i>  | 1   | 11845787            | 11866160           | 356            | 0.951                           | 356           | 0.942                          | 0.009                                                                   |
| <i>NOTCH4</i> | 6   | 32162620            | 32191844           | 360            | 6.000                           | 360           | 18.096                         | -12.096                                                                 |
| <i>NRG1</i>   | 8   | 31496820            | 32622558           | 3917           | 0.377                           | 3917          | 0.313                          | 0.065                                                                   |
| <i>PPP3CC</i> | 8   | 22298596            | 22398638           | 300            | 3.133                           | 300           | 3.582                          | -0.448                                                                  |
| <i>PRODH</i>  | 22  | 18900287            | 18924066           | 272            | 0.242                           | 272           | 0.250                          | -0.008                                                                  |
| <i>RGS4</i>   | 1   | 163038396           | 163046592          | 213            | 0.549                           | 213           | 0.474                          | 0.075                                                                   |
| <i>SLC6A3</i> | 5   | 1392905             | 1445543            | 390            | 0.097                           | 390           | 0.087                          | 0.010                                                                   |
| <i>SLC6A4</i> | 17  | 28523376            | 28562954           | 142            | 1.309                           | 142           | 1.295                          | 0.014                                                                   |
| <i>TNF</i>    | 6   | 31543350            | 31546112           | 248            | 4.131                           | 248           | 5.035                          | -0.904                                                                  |
| <i>ZDHHC8</i> | 22  | 20119364            | 20135530           | 252            | 3.674                           | 252           | 4.695                          | -1.021                                                                  |

**Supplementary Table S7. The top 100 genes (excluding those in the MHC region) most strongly associated with schizophrenia, ranked by z statistic.** Genes are ranked by their gene-level z score calculated by MAGMA, excluding genes in the MHC region. These gene-level results were conducted with extended gene boundaries (i.e. including the +/- 25kb regions upstream or downstream of gene start and end points) and used the sum of the  $-\log(p)$  of the SNP  $p$ -values as the gene-level test statistic.

| Gene            | NCBI_Entrez_ID | Chromosome | Association Statistic (z) from MAGMA | Rank |
|-----------------|----------------|------------|--------------------------------------|------|
| <i>CACNA1C</i>  | 775            | 12         | 8.9187                               | 1    |
| <i>BTN2A1</i>   | 11120          | 6          | 8.7705                               | 2    |
| <i>DPYD</i>     | 1806           | 1          | 8.7298                               | 3    |
| <i>BTN3A2</i>   | 11118          | 6          | 8.5887                               | 4    |
| <i>AS3MT</i>    | 57412          | 10         | 8.567                                | 5    |
| <i>CACNA1I</i>  | 8911           | 22         | 8.4697                               | 6    |
| <i>TCF4</i>     | 6925           | 18         | 8.4521                               | 7    |
| <i>C10orf32</i> | 119032         | 10         | 8.3206                               | 8    |
| <i>CNNM2</i>    | 54805          | 10         | 8.1076                               | 9    |
| <i>FOXP1</i>    | 27086          | 3          | 8.0353                               | 10   |
| <i>PPP1R16B</i> | 26051          | 20         | 7.7184                               | 11   |
| <i>BTN2A2</i>   | 10385          | 6          | 7.6911                               | 12   |
| <i>NT5C2</i>    | 22978          | 10         | 7.6026                               | 13   |
| <i>CACNB2</i>   | 783            | 10         | 7.5212                               | 14   |
| <i>BTN1A1</i>   | 696            | 6          | 7.4992                               | 15   |
| <i>IGSF9B</i>   | 22997          | 11         | 7.4907                               | 16   |
| <i>CYP17A1</i>  | 1586           | 10         | 7.4905                               | 17   |
| <i>SLC17A3</i>  | 10786          | 6          | 7.4698                               | 18   |
| <i>HIST1H1E</i> | 3008           | 6          | 7.3549                               | 19   |
| <i>ZFYVE21</i>  | 79038          | 14         | 7.3009                               | 20   |
| <i>HIST1H3A</i> | 8350           | 6          | 7.2692                               | 21   |
| <i>HFE</i>      | 3077           | 6          | 7.2524                               | 22   |
| <i>HIST1H1A</i> | 3024           | 6          | 7.2311                               | 23   |
| <i>ZSWIM6</i>   | 57688          | 5          | 7.2078                               | 24   |
| <i>HIST1H4A</i> | 8359           | 6          | 7.205                                | 25   |
| <i>PITPNM2</i>  | 57605          | 12         | 7.0991                               | 26   |
| <i>ABT1</i>     | 29777          | 6          | 7.0972                               | 27   |
| <i>C12orf65</i> | 91574          | 12         | 7.0799                               | 28   |
| <i>ESAM</i>     | 90952          | 11         | 7.0789                               | 29   |
| <i>SLC17A1</i>  | 6568           | 6          | 7.0676                               | 30   |
| <i>AMBRA1</i>   | 55626          | 11         | 7.0548                               | 31   |

| Gene             | NCBI_Entrez_ID | Chromosome | Association Statistic (z) from MAGMA | Rank |
|------------------|----------------|------------|--------------------------------------|------|
| <i>TRANK1</i>    | 9881           | 3          | 7.0475                               | 32   |
| <i>XRCC3</i>     | 7517           | 14         | 7.0314                               | 33   |
| <i>VSIG2</i>     | 23584          | 11         | 7.0119                               | 34   |
| <i>NGEF</i>      | 25791          | 2          | 7.0088                               | 35   |
| <i>BTN3A3</i>    | 10384          | 6          | 6.9821                               | 36   |
| <i>HIST1H2AB</i> | 8335           | 6          | 6.9707                               | 37   |
| <i>HIST1H4B</i>  | 8366           | 6          | 6.9641                               | 38   |
| <i>BAG5</i>      | 9529           | 14         | 6.9618                               | 39   |
| <i>CHRNA4</i>    | 1143           | 15         | 6.9471                               | 40   |
| <i>NRGN</i>      | 4900           | 11         | 6.9425                               | 41   |
| <i>SDCCAG8</i>   | 10806          | 1          | 6.9355                               | 42   |
| <i>PPP1R13B</i>  | 23368          | 14         | 6.9346                               | 43   |
| <i>HIST1H3B</i>  | 8358           | 6          | 6.9222                               | 44   |
| <i>HIST1H3C</i>  | 8352           | 6          | 6.9154                               | 45   |
| <i>HIST1H2BB</i> | 3018           | 6          | 6.9078                               | 46   |
| <i>SPATS2L</i>   | 26010          | 2          | 6.9056                               | 47   |
| <i>C2orf69</i>   | 205327         | 2          | 6.9018                               | 48   |
| <i>FXR1</i>      | 8087           | 3          | 6.8526                               | 49   |
| <i>CHRM4</i>     | 1132           | 11         | 6.8073                               | 50   |
| <i>FURIN</i>     | 5045           | 15         | 6.8038                               | 51   |
| <i>TSNARE1</i>   | 203062         | 8          | 6.7943                               | 52   |
| <i>UBE2Q2L</i>   | 100505679      | 15         | 6.7885                               | 53   |
| <i>MDK</i>       | 4192           | 11         | 6.7871                               | 54   |
| <i>FES</i>       | 2242           | 15         | 6.7833                               | 55   |
| <i>HIST1H1T</i>  | 3010           | 6          | 6.7673                               | 56   |
| <i>TYW5</i>      | 129450         | 2          | 6.7505                               | 57   |
| <i>SETD8</i>     | 387893         | 12         | 6.7436                               | 58   |
| <i>HIST1H4C</i>  | 8364           | 6          | 6.7197                               | 59   |
| <i>CDK2AP1</i>   | 8099           | 12         | 6.7047                               | 60   |
| <i>ARL6IP4</i>   | 51329          | 12         | 6.6977                               | 61   |
| <i>DNAJC19</i>   | 131118         | 3          | 6.6696                               | 62   |
| <i>ZNF322</i>    | 79692          | 6          | 6.6653                               | 63   |
| <i>APOPT1</i>    | 84334          | 14         | 6.6584                               | 64   |
| <i>MPHOSPH9</i>  | 10198          | 12         | 6.6283                               | 65   |
| <i>C2orf47</i>   | 79568          | 2          | 6.6188                               | 66   |
| <i>HIST1H1C</i>  | 3006           | 6          | 6.6161                               | 67   |
| <i>BCL11B</i>    | 64919          | 14         | 6.603                                | 68   |
| <i>MAD1L1</i>    | 8379           | 7          | 6.589                                | 69   |

| Gene              | NCBI_Entrez_ID | Chromosome | Association Statistic (z) from MAGMA | Rank |
|-------------------|----------------|------------|--------------------------------------|------|
| <i>DGKZ</i>       | 8525           | 11         | 6.5885                               | 70   |
| <i>SNX19</i>      | 399979         | 11         | 6.582                                | 71   |
| <i>ITIH3</i>      | 3699           | 3          | 6.5814                               | 72   |
| <i>HSPE1-MOB4</i> | 100529241      | 2          | 6.5795                               | 73   |
| <i>OGFOD2</i>     | 79676          | 12         | 6.5766                               | 74   |
| <i>MOB4</i>       | 25843          | 2          | 6.5747                               | 75   |
| <i>ITIH4</i>      | 3700           | 3          | 6.5541                               | 76   |
| <i>HIST1H2BC</i>  | 8347           | 6          | 6.5477                               | 77   |
| <i>VRK2</i>       | 7444           | 2          | 6.5357                               | 78   |
| <i>SMG6</i>       | 23293          | 17         | 6.5163                               | 79   |
| <i>SNAP91</i>     | 9892           | 6          | 6.5071                               | 80   |
| <i>HIST1H2AC</i>  | 8334           | 6          | 6.5046                               | 81   |
| <i>SF3B1</i>      | 23451          | 2          | 6.4796                               | 82   |
| <i>ZSCAN2</i>     | 54993          | 15         | 6.4732                               | 83   |
| <i>MSRA</i>       | 4482           | 8          | 6.467                                | 84   |
| <i>RILPL2</i>     | 196383         | 12         | 6.4655                               | 85   |
| <i>TMEM219</i>    | 124446         | 16         | 6.4149                               | 86   |
| <i>ATG13</i>      | 9776           | 11         | 6.3942                               | 87   |
| <i>KCTD13</i>     | 253980         | 16         | 6.3916                               | 88   |
| <i>SRR</i>        | 63826          | 17         | 6.3551                               | 89   |
| <i>CHRNA3</i>     | 1136           | 15         | 6.3548                               | 90   |
| <i>GIGYF2</i>     | 26058          | 2          | 6.3485                               | 91   |
| <i>SFMBT1</i>     | 51460          | 3          | 6.3397                               | 92   |
| <i>TMEM110</i>    | 375346         | 3          | 6.3386                               | 93   |
| <i>ACTR5</i>      | 79913          | 20         | 6.336                                | 94   |
| <i>TAOK2</i>      | 9344           | 16         | 6.2604                               | 95   |
| <i>ABCB9</i>      | 23457          | 12         | 6.2576                               | 96   |
| <i>CNTN4</i>      | 152330         | 3          | 6.2487                               | 97   |
| <i>TRIM38</i>     | 10475          | 6          | 6.2299                               | 98   |
| <i>SLC45A1</i>    | 50651          | 1          | 6.2049                               | 99   |
| <i>GALNT10</i>    | 55568          | 5          | 6.2043                               | 100  |

## **Supplemental References**

1. De Leeuw CA, Mooij JM, Heskes T, Posthuma D. MAGMA: Generalized Gene-Set Analysis of GWAS Data. *PLoS Comput Biol.* 2015;11(4).
2. Allen NC, Bagade S, McQueen MB, Ioannidis JP a, Kavvoura FK, Khoury MJ, et al. Systematic meta-analyses and field synopsis of genetic association studies in schizophrenia: the SzGene database. *Nat Genet.* 2008;40(7):827–34.
3. Farrell MS, Werge T, Sklar P, Owen MJ, Ophoff RA, O'Donovan MC, et al. Evaluating historical candidate genes for schizophrenia. *Mol Psychiatry.*; 2015 May;20(5):555–62.
4. The 1000 Genomes Project Consortium. An integrated map of genetic variation from 1,092 human genomes. *Nature.*; 2012 Nov 1;491(7422):56–65.
5. Ruano D, Abecasis GR, Glaser B, Lips ES, Cornelisse LN, de Jong APH, et al. Functional Gene Group Analysis Reveals a Role of Synaptic Heterotrimeric G Proteins in Cognitive Ability. *Am J Hum Genet.* 2010;86(2):113–25.
6. Lips ES, Cornelisse LN, Toonen RF, Min JL, Hultman CM, Holmans PA, et al. Functional gene group analysis identifies synaptic gene groups as risk factor for schizophrenia. *Mol Psychiatry.* 2012;17(10):996–1006.
7. Freedman R, Coon H, Myles-Worsley M, Orr-Urtreger A, Olincy A, Davis A, et al. Linkage of a neurophysiological deficit in schizophrenia to a chromosome 15 locus. *Proc Natl Acad Sci U S A.*; 1997 Jan 21;94(2):587–92.
8. Mishra A, Macgregor S, Amos CI, Wang L-E, Lee JE, Gershenwald JE, et al. VEGAS2: Software for More Flexible Gene-Based Testing. *Twin Res Hum Genet.* 2015;18(01):86–91.
